# Supplementary material for: Next-generation sequencing identifies contribution of both class I and II HLA genes on susceptibility of multiple sclerosis in Japanese
Source: Springer Nature journal article supplement (doi:10.1186/s12974-019-1551-z), 2019-08-05
Supplement: MOESM1 [file 17039732]

|                 |       |       |                  |                      |                  |                      |                  |       |                  |        |                  |       |
|-----------------|-------|-------|------------------|----------------------|------------------|----------------------|------------------|-------|------------------|--------|------------------|-------|
| HLA-DQB1*04:01  | 0.222 | 0.100 | 2.56 (1.49-4.42) | 7.0×10 <sup>-4</sup> | 2.80 (1.61-4.87) | 2.8×10 <sup>-4</sup> | 1.97 (1.03-3.75) | 0.040 | 1.75 (0.91-3.39) | 0.094  | 1.85 (0.95-3.61) | 0.072 |
| HLA-DQB1*04:02  | 0.067 | 0.048 | 1.42 (0.59-3.45) | 0.44                 | 1.63 (0.67-3.97) | 0.29                 | 1.53 (0.62-3.78) | 0.36  | 1.52 (0.61-3.77) | 0.37   | 1.52 (0.61-3.81) | 0.37  |
| HLA-DQB1*05:01  | 0.056 | 0.063 | 0.88 (0.27-2.26) | 1.0 *                | —                | —                    | —                | —     | —                | —      | —                | —     |
| HLA-DQB1*05:02  | 0.022 | 0.028 | 0.79 (0.09-3.27) | 1.0 *                | —                | —                    | —                | —     | —                | —      | —                | —     |
| HLA-DQB1*05:03  | 0.056 | 0.044 | 1.27 (0.38-3.35) | 0.59 *               | —                | —                    | —                | —     | —                | —      | —                | —     |
| HLA-DQB1*06:01  | 0.122 | 0.199 | 0.56 (0.29-1.07) | 0.081                | 0.62 (0.32-1.19) | 0.15                 | 0.75 (0.38-1.47) | 0.40  | 0.78 (0.40-1.54) | 0.47   | 0.83 (0.42-1.65) | 0.59  |
| HLA-DQB1*06:02  | 0.200 | 0.068 | 3.45 (1.93-6.17) | 3.0×10 <sup>-5</sup> | 2.00 (0.86-4.67) | 0.11                 | 1.96 (0.84-4.59) | 0.12  | 1.99 (0.85-4.64) | 0.11   | 2.22 (0.97-5.09) | 0.060 |
| HLA-DQB1*06:04  | 0.033 | 0.076 | 0.42 (0.08-1.33) | 0.19 *               | —                | —                    | —                | —     | —                | —      | —                | —     |
| HLA-DQB1*06:09  | 0.022 | 0.003 | 6.45 (0.53-57.1) | 0.074 *              | —                | —                    | —                | —     | —                | —      | —                | —     |
| <b>HLA-DRA</b>  |       |       |                  |                      |                  |                      |                  |       |                  |        |                  |       |
| HLA-DRA*01:01   | 0.733 | 0.579 | 2.00 (1.23-3.25) | 0.0053               | 1.85 (1.13-3.03) | 0.014                | 1.54 (0.92-2.57) | 0.10  | 1.47 (0.87-2.46) | 0.15   | 1.27 (0.75-2.16) | 0.37  |
| HLA-DRA*01:02   | 0.267 | 0.421 | 0.50 (0.31-0.81) | 0.0053               | 0.54 (0.33-0.88) | 0.014                | 0.65 (0.39-1.09) | 0.10  | 0.68 (0.41-1.15) | 0.15   | 0.79 (0.46-1.33) | 0.37  |
| <b>HLA-DRB1</b> |       |       |                  |                      |                  |                      |                  |       |                  |        |                  |       |
| HLA-DRB1*01:01  | 0.044 | 0.058 | 0.75 (0.19-2.12) | 0.81 *               | —                | —                    | —                | —     | —                | —      | —                | —     |
| HLA-DRB1*04:03  | 0.011 | 0.020 | 0.56 (0.01-3.63) | 1.0 *                | —                | —                    | —                | —     | —                | —      | —                | —     |
| HLA-DRB1*04:05  | 0.233 | 0.120 | 2.23 (1.31-3.79) | 0.0030               | 2.83 (1.63-4.90) | 2.2×10 <sup>-4</sup> | —                | —     | —                | —      | —                | —     |
| HLA-DRB1*04:06  | 0.067 | 0.034 | 2.04 (0.82-5.06) | 0.12                 | 2.44 (0.98-6.09) | 0.056                | 3.12 (1.23-7.92) | 0.017 | 3.55 (1.39-9.07) | 0.0080 | 2.24 (0.82-6.12) | 0.12  |
| HLA-DRB1*08:02  | 0.044 | 0.056 | 0.79 (0.20-2.22) | 0.81 *               | —                | —                    | —                | —     | —                | —      | —                | —     |
| HLA-DRB1*08:03  | 0.078 | 0.079 | 0.98 (0.44-2.20) | 0.96                 | 1.17 (0.52-2.66) | 0.71                 | 1.50 (0.65-3.46) | 0.35  | 1.25 (0.53-2.95) | 0.61   | 1.29 (0.54-3.07) | 0.56  |
| HLA-DRB1*09:01  | 0.089 | 0.135 | 0.62 (0.29-1.32) | 0.22                 | 0.74 (0.35-1.59) | 0.45                 | 0.95 (0.43-2.07) | 0.89  | 0.94 (0.43-2.07) | 0.88   | 0.92 (0.42-2.02) | 0.83  |
| HLA-DRB1*12:01  | 0.033 | 0.030 | 1.10 (0.21-3.71) | 0.75 *               | —                | —                    | —                | —     | —                | —      | —                | —     |
| HLA-DRB1*13:02  | 0.056 | 0.078 | 0.69 (0.21-1.77) | 0.54 *               | —                | —                    | —                | —     | —                | —      | —                | —     |
| HLA-DRB1*14:03  | 0.022 | 0.013 | 1.75 (0.19-8.20) | 0.35 *               | —                | —                    | —                | —     | —                | —      | —                | —     |
| HLA-DRB1*14:05  | 0.044 | 0.027 | 1.69 (0.41-5.10) | 0.31 *               | —                | —                    | —                | —     | —                | —      | —                | —     |
| HLA-DRB1*14:54  | 0.022 | 0.036 | 0.61 (0.07-2.45) | 0.76 *               | —                | —                    | —                | —     | —                | —      | —                | —     |
| HLA-DRB1*15:01  | 0.211 | 0.072 | 3.44 (1.95-6.07) | 2.1×10 <sup>-5</sup> | —                | —                    | —                | —     | —                | —      | —                | —     |
| HLA-DRB1*15:02  | 0.033 | 0.120 | 0.25 (0.05-0.79) | 0.012 *              | —                | —                    | —                | —     | —                | —      | —                | —     |
| <b>HLA-E</b>    |       |       |                  |                      |                  |                      |                  |       |                  |        |                  |       |
| HLA-E*01:01     | 0.344 | 0.307 | 1.19 (0.75-1.88) | 0.46                 | 1.25 (0.79-1.99) | 0.35                 | 1.13 (0.70-1.81) | 0.62  | 1.04 (0.64-1.68) | 0.88   | 0.92 (0.56-1.50) | 0.74  |
| HLA-E*01:03     | 0.656 | 0.694 | 0.84 (0.53-1.33) | 0.46                 | 0.80 (0.50-1.27) | 0.35                 | 0.89 (0.55-1.42) | 0.62  | 0.96 (0.60-1.56) | 0.88   | 1.09 (0.67-1.77) | 0.74  |
| <b>HLA-F</b>    |       |       |                  |                      |                  |                      |                  |       |                  |        |                  |       |
| HLA-F*01:01     | 0.978 | 0.980 | 0.89 (0.20-3.91) | 0.88                 | 0.92 (0.21-4.13) | 0.91                 | 1.01 (0.22-4.59) | 0.99  | 1.00 (0.22-4.54) | 1.0    | 0.86 (0.19-3.90) | 0.84  |
| HLA-F*01:05     | 0.022 | 0.014 | 1.60 (0.17-7.37) | 0.63 *               | —                | —                    | —                | —     | —                | —      | —                | —     |
| <b>HLA-G</b>    |       |       |                  |                      |                  |                      |                  |       |                  |        |                  |       |
| HLA-G*01:01     | 0.578 | 0.511 | 1.31 (0.85-2.04) | 0.23                 | 1.34 (0.86-2.09) | 0.20                 | 1.22 (0.78-1.91) | 0.39  | 1.11 (0.70-1.76) | 0.65   | 0.90 (0.56-1.47) | 0.68  |
| HLA-G*01:03     | 0.011 | 0.001 | 9.58 (0.12-752)  | 0.18 *               | —                | —                    | —                | —     | —                | —      | —                | —     |
| HLA-G*01:04     | 0.411 | 0.479 | 0.76 (0.49-1.18) | 0.22                 | 0.75 (0.48-1.16) | 0.20                 | 0.82 (0.52-1.29) | 0.38  | 0.89 (0.56-1.42) | 0.63   | 1.09 (0.67-1.77) | 0.73  |

\* Fisher's exact test was used for association analysis, otherwise logistic regression was used.





| <b>HLA-DRB1</b> |       |       |                   |        |   |                  |       |
|-----------------|-------|-------|-------------------|--------|---|------------------|-------|
| HLA-DRB1*01:01  | 0.129 | 0.058 | 2.39 (1.08-5.30)  | 0.031  |   | 2.65 (1.19-5.90) | 0.017 |
| HLA-DRB1*04:01  | 0.016 | 0.013 | 1.26 (0.03-8.95)  | 0.57   | * | —                | —     |
| HLA-DRB1*04:03  | 0.032 | 0.020 | 1.65 (0.18-7.21)  | 0.37   | * | —                | —     |
| HLA-DRB1*04:05  | 0.145 | 0.120 | 1.24 (0.60-2.60)  | 0.56   |   | 1.27 (0.60-2.66) | 0.53  |
| HLA-DRB1*04:10  | 0.016 | 0.014 | 1.16 (0.03-8.05)  | 0.60   | * | —                | —     |
| HLA-DRB1*08:02  | 0.048 | 0.056 | 0.86 (0.17-2.79)  | 1.0    | * | —                | —     |
| HLA-DRB1*08:03  | 0.065 | 0.079 | 0.80 (0.21-2.27)  | 1.0    | * | —                | —     |
| HLA-DRB1*09:01  | 0.016 | 0.135 | 0.10 (0.003-0.62) | 0.0027 | * | —                | —     |
| HLA-DRB1*10:01  | 0.016 | 0.003 | 4.66 (0.09-59.0)  | 0.24   | * | —                | —     |
| HLA-DRB1*11:01  | 0.065 | 0.027 | 2.50 (0.61-7.67)  | 0.10   | * | —                | —     |
| HLA-DRB1*12:01  | 0.016 | 0.030 | 0.52 (0.01-3.31)  | 1.0    | * | —                | —     |
| HLA-DRB1*13:02  | 0.032 | 0.078 | 0.39 (0.05-1.55)  | 0.31   | * | —                | —     |
| HLA-DRB1*14:05  | 0.032 | 0.027 | 1.21 (0.14-5.09)  | 0.68   | * | —                | —     |
| HLA-DRB1*14:06  | 0.081 | 0.012 | 7.40(1.92-24.8)   | 0.0021 | * | —                | —     |
| HLA-DRB1*14:54  | 0.016 | 0.036 | 0.44 (0.01-2.72)  | 0.72   | * | —                | —     |
| HLA-DRB1*15:01  | 0.129 | 0.072 | 1.90 (0.87-4.18)  | 0.11   |   | 1.98 (0.90-4.39) | 0.092 |
| HLA-DRB1*15:02  | 0.129 | 0.120 | 1.09 (0.50-2.35)  | 0.83   |   | 1.10 (0.51-2.40) | 0.81  |
| HLA-DRB1*16:02  | 0.016 | 0.007 | 2.32 (0.05-19.6)  | 0.39   | * | —                | —     |
| <b>HLA-E</b>    |       |       |                   |        |   |                  |       |
| HLA-E*01:01     | 0.290 | 0.307 | 0.93 (0.53-1.63)  | 0.79   |   | 1.02 (0.58-1.82) | 0.93  |
| HLA-E*01:03     | 0.710 | 0.694 | 1.08 (0.61-1.91)  | 0.79   |   | 0.98 (0.55-1.74) | 0.93  |
| <b>HLA-F</b>    |       |       |                   |        |   |                  |       |
| HLA-F*01:01     | 1.000 | 0.980 | Inf               | 0.98   |   | Inf              | 0.98  |
| <b>HLA-G</b>    |       |       |                   |        |   |                  |       |
| HLA-G*01:01     | 0.597 | 0.511 | 1.42 (0.84-2.40)  | 0.19   |   | 1.45 (0.85-2.47) | 0.17  |
| HLA-G*01:03     | 0.016 | 0.001 | 13.9 (0.18-1093)  | 0.13   | * | —                | —     |
| HLA-G*01:04     | 0.387 | 0.479 | 0.69 (0.41-1.17)  | 0.16   |   | 0.69 (0.41-1.18) | 0.18  |

\* Fisher's exact test was used for association analysis, otherwise logistic regression was used.

Table S3-1. Results of the HLA amino acid association analysis (multiple sclerosis)

| Variant                  | Position | amino acid | Frequency |                  | OR (95%CI)       | P                    | Fisher | Omnibus P            |
|--------------------------|----------|------------|-----------|------------------|------------------|----------------------|--------|----------------------|
|                          |          |            | MS (n=45) | Control (n=429)  |                  |                      |        |                      |
| HLA-β<br>(128amino acid) | -23      | L          | 0.256     | 0.162            | 1.78 (1.07-2.95) | 0.027                |        | 0.033                |
|                          | -23      | R          | 0.744     | 0.838            | 0.56 (0.34-0.94) | 0.027                |        |                      |
|                          | -21      | M          | 0.256     | 0.162            | 1.78 (1.07-2.95) | 0.027                |        | 0.033                |
|                          | -21      | T          | 0.744     | 0.838            | 0.56 (0.34-0.94) | 0.027                |        |                      |
|                          | -16      | L          | 0.233     | 0.353            | 0.56 (0.34-0.93) | 0.024                |        | 0.019                |
|                          | -16      | V          | 0.767     | 0.647            | 1.79 (1.08-2.98) | 0.024                |        |                      |
|                          | -11      | S          | 0.567     | 0.379            | 2.14 (1.38-3.33) | 6.6×10 <sup>-4</sup> |        | 6.2×10 <sup>-4</sup> |
|                          | -11      | W          | 0.433     | 0.621            | 0.47 (0.30-0.72) | 6.6×10 <sup>-4</sup> |        |                      |
|                          | -10      | A          | 0.322     | 0.221            | 1.67 (1.04-2.68) | 0.032                |        | 0.037                |
|                          | -10      | G          | 0.678     | 0.779            | 0.60 (0.37-0.96) | 0.032                |        |                      |
|                          | -8       | L          | 0.656     | 0.499            | 1.91 (1.21-3.01) | 0.0052               |        | 0.0043               |
|                          | -8       | V          | 0.344     | 0.501            | 0.52 (0.33-0.82) | 0.0052               |        |                      |
|                          | 9        | H          | 0.178     | 0.199            | 0.87 (0.49-1.53) | 0.63                 |        | 0.62                 |
|                          | 9        | Y          | 0.822     | 0.801            | 1.15 (0.65-2.03) | 0.63                 |        |                      |
|                          | 11       | A          | 0.633     | 0.702            | 0.73 (0.47-1.16) | 0.18                 |        | 0.19                 |
|                          | 11       | S          | 0.367     | 0.298            | 1.36 (0.87-2.14) | 0.18                 |        |                      |
|                          | 12       | M          | 0.633     | 0.702            | 0.73 (0.47-1.16) | 0.18                 |        | 0.19                 |
|                          | 12       | V          | 0.367     | 0.298            | 1.36 (0.87-2.14) | 0.18                 |        |                      |
|                          | 24       | A          | 0.533     | 0.527            | 1.03 (0.66-1.59) | 0.91                 |        | 0.14                 |
|                          | 24       | S          | 0.256     | 0.184            | 1.52 (0.92-2.52) | 0.10                 |        |                      |
|                          | 24       | T          | 0.211     | 0.289            | 0.66 (0.39-1.12) | 0.12                 |        |                      |
|                          | 32       | L          | 0.211     | 0.276            | 0.70 (0.41-1.19) | 0.19                 |        | 0.18                 |
|                          | 32       | Q          | 0.789     | 0.724            | 1.43 (0.84-2.42) | 0.19                 |        |                      |
|                          | 41       | A          | 0.789     | 0.712            | 1.51 (0.89-2.56) | 0.13                 |        | 0.11                 |
|                          | 41       | T          | 0.211     | 0.288            | 0.66 (0.39-1.12) | 0.13                 |        |                      |
|                          | 45       | E          | 0.278     | 0.233            | 1.27 (0.78-2.06) | 0.34                 |        | 0.11                 |
|                          | 45       | G          | 0.067     | 0.069            | 0.97 (0.41-2.31) | 0.94                 |        |                      |
|                          | 45       | K          | 0.211     | 0.275            | 0.71 (0.42-1.20) | 0.19                 |        |                      |
|                          | 45       | M          | 0.244     | 0.152            | 1.81 (1.08-3.03) | 0.024                |        |                      |
|                          | 45       | T          | 0.200     | 0.272            | 0.67 (0.39-1.15) | 0.15                 |        |                      |
|                          | 46       | A          | 0.244     | 0.152            | 1.81 (1.08-3.03) | 0.024                |        | 0.030                |
|                          | 46       | E          | 0.756     | 0.849            | 0.55 (0.33-0.92) | 0.024                |        |                      |
|                          | 52       | I          | 0.933     | 0.931            | 1.03 (0.43-2.47) | 0.94                 |        | 0.94                 |
|                          | 52       | V          | 0.067     | 0.069            | 0.97 (0.41-2.31) | 0.94                 |        |                      |
|                          | 62       | G          | 0.022     | 0.005            | 4.84 (0.43-34.3) | 0.10                 | *      | 0.11                 |
|                          | 62       | R          | 0.978     | 0.995            | 0.21 (0.04-1.14) | 0.070                |        |                      |
|                          | 63       | E          | 0.533     | 0.599            | 0.76 (0.49-1.18) | 0.23                 |        | 0.23                 |
|                          | 63       | N          | 0.467     | 0.401            | 1.31 (0.85-2.02) | 0.23                 |        |                      |
|                          | 65       | Q          | 0.978     | 0.995            | 0.21 (0.04-1.14) | 0.070                |        | 0.11                 |
|                          | 65       | R          | 0.022     | 0.005            | 4.84 (0.43-34.3) | 0.10                 | *      |                      |
|                          | 66       | I          | 0.956     | 0.949            | 1.16 (0.41-3.31) | 0.78                 |        | 0.14                 |
|                          | 66       | K          | 0.022     | 0.047            | 0.47 (0.05-1.85) | 0.42                 | *      |                      |
|                          | 66       | N          | 0.022     | 0.005            | 4.84 (0.43-34.3) | 0.10                 | *      |                      |
|                          | 67       | C          | 0.122     | 0.070            | 1.85 (0.94-3.67) | 0.077                |        | 0.22                 |
|                          | 67       | F          | 0.144     | 0.153            | 0.94 (0.51-1.74) | 0.84                 |        |                      |
|                          | 67       | M          | 0.022     | 0.005            | 4.84 (0.43-34.3) | 0.10                 | *      |                      |
|                          | 67       | S          | 0.489     | 0.548            | 0.79 (0.51-1.22) | 0.29                 |        |                      |
|                          | 67       | Y          | 0.222     | 0.225            | 0.98 (0.58-1.66) | 0.95                 |        |                      |
|                          | 69       | A          | 0.200     | 0.181            | 1.13 (0.66-1.96) | 0.65                 |        | 0.48                 |
|                          | 69       | R          | 0.022     | 0.047            | 0.47 (0.05-1.85) | 0.42                 | *      |                      |
|                          | 69       | T          | 0.778     | 0.773            | 1.03 (0.61-1.73) | 0.91                 |        |                      |
|                          | 70       | N          | 0.778     | 0.773            | 1.03 (0.61-1.73) | 0.91                 |        | 0.23                 |
|                          | 70       | Q          | 0.200     | 0.221            | 0.88 (0.51-1.51) | 0.64                 |        |                      |
|                          | 70       | S          | 0.022     | 0.005            | 4.84 (0.43-34.3) | 0.10                 | *      |                      |
| 71                       | A        | 0.222      | 0.227     | 0.97 (0.58-1.64) | 0.91             |                      | 0.91   |                      |
| 71                       | T        | 0.778      | 0.773     | 1.03 (0.61-1.73) | 0.91             |                      |        |                      |
| 74                       | D        | 0.322      | 0.273     | 1.27 (0.79-2.02) | 0.32             |                      | 0.33   |                      |
| 74                       | Y        | 0.678      | 0.727     | 0.79 (0.49-1.26) | 0.32             |                      |        |                      |
| 76                       | E        | 0.978      | 0.953     | 2.15 (0.51-9.05) | 0.30             |                      | 0.24   |                      |
| 76                       | V        | 0.022      | 0.047     | 0.47 (0.05-1.85) | 0.42             | *                    |        |                      |
| 77                       | N        | 0.200      | 0.322     | 0.53 (0.31-0.90) | 0.019            |                      | 0.0093 |                      |
| 77                       | S        | 0.800      | 0.675     | 1.93 (1.13-3.29) | 0.016            |                      |        |                      |
| 80                       | I        | 0.167      | 0.225     | 0.69 (0.39-1.23) | 0.21             |                      | 0.015  |                      |
| 80                       | N        | 0.800      | 0.674     | 1.94 (1.13-3.31) | 0.016            |                      |        |                      |
| 80                       | T        | 0.033      | 0.101     | 0.31 (0.06-0.96) | 0.036            | *                    |        |                      |
| 81                       | A        | 0.200      | 0.322     | 0.53 (0.31-0.90) | 0.019            |                      | 0.014  |                      |
| 81                       | L        | 0.800      | 0.678     | 1.90 (1.11-3.24) | 0.019            |                      |        |                      |
| 82                       | L        | 0.200      | 0.326     | 0.52 (0.30-0.88) | 0.016            |                      | 0.011  |                      |
| 82                       | R        | 0.800      | 0.674     | 1.94 (1.13-3.31) | 0.016            |                      |        |                      |
| 83                       | G        | 0.800      | 0.674     | 1.94 (1.13-3.31) | 0.016            |                      | 0.011  |                      |
| 83                       | R        | 0.200      | 0.326     | 0.52 (0.30-0.88) | 0.016            |                      |        |                      |
| 94                       | I        | 0.100      | 0.157     | 0.60 (0.29-1.21) | 0.15             |                      | 0.13   |                      |
| 94                       | T        | 0.900      | 0.843     | 1.68 (0.82-3.43) | 0.15             |                      |        |                      |
| 95                       | I        | 0.100      | 0.161     | 0.58 (0.28-1.18) | 0.13             |                      | 0.0066 |                      |
| 95                       | L        | 0.633      | 0.459     | 2.03 (1.30-3.19) | 0.0019           |                      |        |                      |
| 95                       | W        | 0.267      | 0.380     | 0.59 (0.36-0.97) | 0.036            |                      |        |                      |
| 97                       | R        | 0.567      | 0.439     | 1.67 (1.08-2.59) | 0.022            |                      | 0.047  |                      |
| 97                       | S        | 0.167      | 0.180     | 0.91 (0.51-1.63) | 0.76             |                      |        |                      |
| 97                       | T        | 0.267      | 0.380     | 0.59 (0.36-0.97) | 0.036            |                      |        |                      |
| 103                      | L        | 0.156      | 0.196     | 0.76 (0.42-1.37) | 0.36             |                      | 0.35   |                      |
| 103                      | V        | 0.844      | 0.804     | 1.32 (0.73-2.40) | 0.36             |                      |        |                      |
| 113                      | H        | 0.967      | 0.914     | 2.74 (0.85-8.86) | 0.093            |                      | 0.052  |                      |
| 113                      | Y        | 0.033      | 0.086     | 0.37 (0.07-1.15) | 0.10             | *                    |        |                      |
| 114                      | D        | 0.422      | 0.365     | 1.27 (0.82-1.98) | 0.28             |                      | 0.25   |                      |
| 114                      | N        | 0.578      | 0.634     | 0.79 (0.51-1.23) | 0.29             |                      |        |                      |
| 116                      | D        | 0.033      | 0.082     | 0.39 (0.08-1.22) | 0.14             | *                    | 0.0043 |                      |
| 116                      | F        | 0.156      | 0.069     | 2.49 (1.33-4.68) | 0.0044           |                      |        |                      |
| 116                      | L        | 0.089      | 0.132     | 0.64 (0.30-1.37) | 0.25             |                      |        |                      |
| 116                      | S        | 0.322      | 0.225     | 1.64 (1.02-2.62) | 0.040            |                      |        |                      |
| 116                      | Y        | 0.400      | 0.493     | 0.69 (0.44-1.07) | 0.094            |                      |        |                      |
| 131                      | R        | 0.278      | 0.291     | 0.94 (0.58-1.52) | 0.79             |                      | 0.79   |                      |
| 131                      | S        | 0.722      | 0.709     | 1.07 (0.66-1.73) | 0.79             |                      |        |                      |
| 143                      | S        | 0.100      | 0.097     | 1.04 (0.50-2.14) | 0.92             |                      | 0.92   |                      |

|                         |     |       |       |                  |                  |         |         |
|-------------------------|-----|-------|-------|------------------|------------------|---------|---------|
| 143                     | T   | 0.900 | 0.903 | 0.96 (0.47-1.99) | 0.92             |         |         |
| 147                     | L   | 0.100 | 0.097 | 1.04 (0.50-2.14) | 0.92             | 0.92    |         |
| 147                     | W   | 0.900 | 0.903 | 0.96 (0.47-1.99) | 0.92             |         |         |
| 152                     | E   | 0.444 | 0.422 | 1.10 (0.71-1.70) | 0.68             | 0.68    |         |
| 152                     | V   | 0.556 | 0.578 | 0.91 (0.59-1.41) | 0.68             |         |         |
| 156                     | L   | 0.689 | 0.795 | 0.57 (0.35-0.92) | 0.021            | 0.018   |         |
| 156                     | R   | 0.067 | 0.059 | 1.13 (0.47-2.71) | 0.78             |         |         |
| 156                     | W   | 0.244 | 0.138 | 2.03 (1.21-3.41) | 0.0075           |         |         |
| 158                     | A   | 0.844 | 0.935 | 0.38 (0.20-0.71) | 0.0026           | 0.0053  |         |
| 158                     | T   | 0.156 | 0.065 | 2.64 (1.40-4.96) | 0.0026           |         |         |
| 163                     | E   | 0.278 | 0.305 | 0.87 (0.54-1.42) | 0.59             | 0.28    |         |
| 163                     | L   | 0.478 | 0.521 | 0.84 (0.54-1.30) | 0.44             |         |         |
| 163                     | T   | 0.244 | 0.174 | 1.54 (0.92-2.57) | 0.099            |         |         |
| 167                     | S   | 0.033 | 0.080 | 0.39 (0.08-1.24) | 0.14             | * 0.076 |         |
| 167                     | W   | 0.967 | 0.920 | 2.54 (0.78-8.23) | 0.12             |         |         |
| 171                     | H   | 0.133 | 0.202 | 0.61 (0.32-1.14) | 0.12             | 0.10    |         |
| 171                     | Y   | 0.867 | 0.798 | 1.64 (0.87-3.08) | 0.12             |         |         |
| 177                     | D   | 0.167 | 0.156 | 1.08 (0.60-1.94) | 0.79             | 0.80    |         |
| 177                     | E   | 0.833 | 0.844 | 0.93 (0.52-1.66) | 0.79             |         |         |
| 178                     | K   | 0.167 | 0.156 | 1.08 (0.60-1.94) | 0.79             | 0.80    |         |
| 178                     | T   | 0.833 | 0.844 | 0.93 (0.52-1.66) | 0.79             |         |         |
| 180                     | E   | 0.167 | 0.156 | 1.08 (0.60-1.94) | 0.79             | 0.80    |         |
| 180                     | Q   | 0.833 | 0.844 | 0.93 (0.52-1.66) | 0.79             |         |         |
| 194                     | I   | 0.800 | 0.732 | 1.46 (0.86-2.51) | 0.16             | 0.15    |         |
| 194                     | V   | 0.200 | 0.268 | 0.68 (0.40-1.17) | 0.16             |         |         |
| 199                     | A   | 0.967 | 0.920 | 2.54 (0.78-8.23) | 0.12             | 0.076   |         |
| 199                     | V   | 0.033 | 0.080 | 0.39 (0.08-1.24) | 0.14             | * 0.076 |         |
| 245                     | A   | 0.967 | 0.963 | 1.12 (0.34-3.74) | 0.85             | 0.85    |         |
| 245                     | T   | 0.033 | 0.037 | 0.89 (0.17-2.94) | 1.0              | * 0.85  |         |
| 282                     | I   | 0.533 | 0.548 | 0.94 (0.61-1.46) | 0.79             | 0.60    |         |
| 282                     | V   | 0.467 | 0.451 | 1.06 (0.69-1.65) | 0.78             |         |         |
| 305                     | A   | 0.467 | 0.451 | 1.06 (0.69-1.65) | 0.78             | 0.60    |         |
| 305                     | T   | 0.533 | 0.548 | 0.94 (0.61-1.46) | 0.79             |         |         |
| 325                     | C   | 0.311 | 0.386 | 0.72 (0.45-1.15) | 0.17             | 0.14    |         |
| 325                     | S   | 0.689 | 0.613 | 1.40 (0.88-2.23) | 0.16             |         |         |
| <b>HLA-DRβ1</b>         | -25 | K     | 0.689 | 0.598            | 1.49 (0.93-2.37) | 0.094   | 0.028   |
| <b>(114 amino acid)</b> | -25 | R     | 0.311 | 0.388            | 0.71 (0.45-1.14) | 0.15    |         |
|                         | -24 | F     | 0.311 | 0.203            | 1.78 (1.10-2.86) | 0.018   | 0.0067  |
|                         | -24 | L     | 0.689 | 0.783            | 0.61 (0.38-0.99) | 0.043   |         |
|                         | -17 | A     | 0.711 | 0.728            | 0.92 (0.57-1.48) | 0.73    | 0.099   |
|                         | -17 | T     | 0.289 | 0.258            | 1.17 (0.72-1.89) | 0.52    |         |
|                         | -16 | A     | 0.689 | 0.598            | 1.49 (0.93-2.37) | 0.094   | 0.026   |
|                         | -16 | V     | 0.311 | 0.387            | 0.72 (0.45-1.14) | 0.16    |         |
|                         | -1  | A     | 0.756 | 0.794            | 0.80 (0.48-1.34) | 0.40    | 0.058   |
|                         | -1  | S     | 0.244 | 0.192            | 1.36 (0.82-2.26) | 0.24    |         |
|                         | 4   | Q     | 0.089 | 0.138            | 0.61 (0.29-1.30) | 0.20    | 0.047   |
|                         | 4   | R     | 0.911 | 0.851            | 1.80 (0.85-3.80) | 0.13    |         |
|                         | 9   | E     | 0.622 | 0.596            | 1.12 (0.72-1.75) | 0.62    | 0.17    |
|                         | 9   | K     | 0.089 | 0.136            | 0.62 (0.29-1.31) | 0.21    |         |
|                         | 9   | W     | 0.289 | 0.259            | 1.16 (0.72-1.88) | 0.54    |         |
|                         | 10  | Q     | 0.689 | 0.598            | 1.49 (0.93-2.37) | 0.094   | 0.031   |
|                         | 10  | Y     | 0.311 | 0.389            | 0.71 (0.44-1.13) | 0.15    |         |
|                         | 11  | D     | 0.089 | 0.136            | 0.62 (0.29-1.31) | 0.21    | 0.050   |
|                         | 11  | L     | 0.044 | 0.058            | 0.75 (0.19-2.12) | 0.81    | * 0.050 |
|                         | 11  | P     | 0.244 | 0.199            | 1.30 (0.78-2.16) | 0.31    |         |
|                         | 11  | S     | 0.311 | 0.389            | 0.71 (0.44-1.13) | 0.15    |         |
|                         | 11  | V     | 0.311 | 0.206            | 1.74 (1.08-2.80) | 0.023   |         |
|                         | 12  | K     | 0.689 | 0.601            | 1.47 (0.92-2.34) | 0.11    | 0.046   |
|                         | 12  | T     | 0.311 | 0.389            | 0.71 (0.44-1.13) | 0.15    |         |
|                         | 13  | F     | 0.133 | 0.198            | 0.62 (0.33-1.17) | 0.14    | 0.038   |
|                         | 13  | G     | 0.167 | 0.189            | 0.86 (0.48-1.53) | 0.61    |         |
|                         | 13  | H     | 0.311 | 0.203            | 1.78 (1.10-2.86) | 0.018   |         |
|                         | 13  | R     | 0.244 | 0.199            | 1.30 (0.78-2.16) | 0.31    |         |
|                         | 13  | S     | 0.144 | 0.201            | 0.67 (0.37-1.24) | 0.20    |         |
|                         | 16  | H     | 0.789 | 0.775            | 1.08 (0.64-1.84) | 0.76    | 0.27    |
|                         | 16  | Q     | 0.044 | 0.027            | 1.69 (0.41-5.10) | 0.31    | * 0.27  |
|                         | 16  | Y     | 0.167 | 0.189            | 0.86 (0.48-1.53) | 0.61    |         |
|                         | 26  | F     | 0.833 | 0.738            | 1.78 (1.00-3.16) | 0.05    | 0.070   |
|                         | 26  | L     | 0.078 | 0.115            | 0.65 (0.29-1.44) | 0.28    |         |
|                         | 26  | Y     | 0.089 | 0.138            | 0.61 (0.29-1.30) | 0.20    |         |
|                         | 28  | D     | 0.811 | 0.712            | 1.74 (1.00-3.00) | 0.049   | 0.068   |
|                         | 28  | E     | 0.100 | 0.142            | 0.67 (0.33-1.37) | 0.27    |         |
|                         | 28  | H     | 0.089 | 0.136            | 0.62 (0.29-1.31) | 0.21    |         |
|                         | 30  | C     | 0.044 | 0.058            | 0.75 (0.19-2.12) | 0.81    | * 0.11  |
|                         | 30  | G     | 0.089 | 0.136            | 0.62 (0.29-1.31) | 0.21    |         |
|                         | 30  | H     | 0.033 | 0.054            | 0.61 (0.12-1.96) | 0.62    | * 0.11  |
|                         | 30  | Y     | 0.833 | 0.738            | 1.78 (1.00-3.16) | 0.05    |         |
|                         | 31  | F     | 0.867 | 0.793            | 1.70 (0.91-3.19) | 0.098   | 0.033   |
|                         | 31  | I     | 0.133 | 0.195            | 0.64 (0.34-1.20) | 0.16    |         |
|                         | 32  | H     | 0.189 | 0.228            | 0.79 (0.45-1.37) | 0.39    | 0.12    |
|                         | 32  | Y     | 0.811 | 0.762            | 1.34 (0.77-2.32) | 0.30    |         |
|                         | 33  | H     | 0.311 | 0.203            | 1.78 (1.10-2.86) | 0.018   | 0.010   |
|                         | 33  | N     | 0.689 | 0.788            | 0.60 (0.37-0.96) | 0.033   |         |
|                         | 37  | F     | 0.078 | 0.064            | 1.23 (0.54-2.79) | 0.62    | 0.19    |
|                         | 37  | L     | 0.033 | 0.054            | 0.61 (0.12-1.96) | 0.62    | * 0.19  |
|                         | 37  | N     | 0.167 | 0.245            | 0.62 (0.35-1.10) | 0.10    |         |
|                         | 37  | S     | 0.356 | 0.291            | 1.34 (0.85-2.12) | 0.21    |         |
|                         | 37  | Y     | 0.367 | 0.337            | 1.14 (0.73-1.79) | 0.57    |         |
|                         | 38  | L     | 0.033 | 0.054            | 0.61 (0.12-1.96) | 0.62    | * 0.082 |
|                         | 38  | V     | 0.967 | 0.934            | 2.06 (0.63-6.73) | 0.23    |         |
|                         | 47  | F     | 0.333 | 0.356            | 0.91 (0.57-1.44) | 0.68    | 0.18    |
|                         | 47  | Y     | 0.667 | 0.635            | 1.15 (0.73-1.82) | 0.55    |         |
|                         | 57  | A     | 0.022 | 0.036            | 0.61 (0.07-2.45) | 0.76    | * 0.057 |
|                         | 57  | D     | 0.544 | 0.549            | 0.98 (0.63-1.52) | 0.93    |         |
|                         | 57  | S     | 0.311 | 0.215            | 1.65 (1.03-2.66) | 0.038   |         |
|                         | 57  | V     | 0.122 | 0.191            | 0.59 (0.31-1.13) | 0.11    |         |
|                         | 60  | H     | 0.022 | 0.036            | 0.61 (0.07-2.45) | 0.76    | * 0.070 |

|                         |          |          |       |                  |                  |                      |                      |
|-------------------------|----------|----------|-------|------------------|------------------|----------------------|----------------------|
| 60                      | S        | 0.122    | 0.191 | 0.59 (0.31-1.13) | 0.11             |                      |                      |
| 60                      | Y        | 0.856    | 0.763 | 1.84 (1.00-3.37) | 0.050            |                      |                      |
| 67                      | F        | 0.144    | 0.240 | 0.53 (0.29-0.98) | 0.043            | 0.033                |                      |
| 67                      | I        | 0.411    | 0.389 | 1.10 (0.70-1.70) | 0.69             |                      |                      |
| 67                      | L        | 0.444    | 0.361 | 1.41 (0.91-2.19) | 0.12             |                      |                      |
| 70                      | D        | 0.244    | 0.322 | 0.68 (0.41-1.13) | 0.14             | 0.029                |                      |
| 70                      | Q        | 0.600    | 0.466 | 1.72 (1.10-2.67) | 0.017            |                      |                      |
| 70                      | R        | 0.156    | 0.203 | 0.72 (0.40-1.31) | 0.29             |                      |                      |
| 71                      | A        | 0.244    | 0.192 | 1.36 (0.82-2.26) | 0.24             | 0.055                |                      |
| 71                      | E        | 0.056    | 0.082 | 0.66 (0.20-1.69) | 0.54             | *                    |                      |
| 71                      | R        | 0.700    | 0.703 | 0.99 (0.61-1.59) | 0.96             |                      |                      |
| 74                      | A        | 0.611    | 0.584 | 1.12 (0.72-1.75) | 0.62             | 0.32                 |                      |
| 74                      | E        | 0.233    | 0.255 | 0.89 (0.53-1.48) | 0.65             |                      |                      |
| 74                      | L        | 0.156    | 0.149 | 1.05 (0.58-1.91) | 0.87             |                      |                      |
| 78                      | V        | 0.089    | 0.138 | 0.61 (0.29-1.30) | 0.20             | 0.060                |                      |
| 78                      | Y        | 0.911    | 0.853 | 1.76 (0.83-3.74) | 0.14             |                      |                      |
| 85                      | A        | 0.033    | 0.054 | 0.61 (0.12-1.96) | 0.62             | *                    | 0.12                 |
| 85                      | V        | 0.967    | 0.937 | 1.95 (0.60-6.36) | 0.27             |                      |                      |
| 86                      | G        | 0.611    | 0.717 | 0.62 (0.40-0.97) | 0.038            | 0.012                |                      |
| 86                      | V        | 0.389    | 0.274 | 1.69 (1.08-2.64) | 0.023            |                      |                      |
| 96                      | E        | 0.044    | 0.058 | 0.75 (0.19-2.12) | 0.81             | *                    | 0.023                |
| 96                      | H        | 0.400    | 0.525 | 0.60 (0.39-0.94) | 0.026            |                      |                      |
| 96                      | Q        | 0.244    | 0.203 | 1.27 (0.76-2.12) | 0.35             |                      |                      |
| 96                      | Y        | 0.311    | 0.203 | 1.78 (1.10-2.86) | 0.018            |                      |                      |
| 98                      | E        | 0.400    | 0.340 | 1.29 (0.83-2.02) | 0.26             | 0.079                |                      |
| 98                      | K        | 0.600    | 0.648 | 0.81 (0.52-1.27) | 0.37             |                      |                      |
| 104                     | A        | 0.400    | 0.340 | 1.29 (0.83-2.02) | 0.26             | 0.079                |                      |
| 104                     | S        | 0.600    | 0.648 | 0.81 (0.52-1.27) | 0.37             |                      |                      |
| 120                     | N        | 0.311    | 0.206 | 1.74 (1.08-2.80) | 0.023            | 0.010                |                      |
| 120                     | S        | 0.689    | 0.782 | 0.62 (0.38-0.99) | 0.046            |                      |                      |
| 133                     | L        | 0.244    | 0.199 | 1.30 (0.78-2.16) | 0.31             | 0.089                |                      |
| 133                     | R        | 0.756    | 0.789 | 0.83 (0.50-1.37) | 0.46             |                      |                      |
| 140                     | A        | 0.378    | 0.395 | 0.93 (0.59-1.45) | 0.75             | 0.14                 |                      |
| 140                     | T        | 0.622    | 0.593 | 1.13 (0.72-1.77) | 0.59             |                      |                      |
| 142                     | M        | 0.244    | 0.199 | 1.30 (0.78-2.16) | 0.31             | 0.089                |                      |
| 142                     | V        | 0.756    | 0.789 | 0.83 (0.50-1.37) | 0.46             |                      |                      |
| 149                     | H        | 0.311    | 0.385 | 0.72 (0.45-1.15) | 0.17             | 0.041                |                      |
| 149                     | Q        | 0.689    | 0.604 | 1.45 (0.91-2.32) | 0.12             |                      |                      |
| 180                     | L        | 0.311    | 0.203 | 1.78 (1.10-2.86) | 0.018            | 0.0082               |                      |
| 180                     | V        | 0.689    | 0.786 | 0.60 (0.38-0.97) | 0.038            |                      |                      |
| 181                     | M        | 0.089    | 0.141 | 0.59 (0.28-1.26) | 0.17             | 0.040                |                      |
| 181                     | T        | 0.911    | 0.847 | 1.85 (0.87-3.91) | 0.11             |                      |                      |
| 189                     | R        | 0.867    | 0.853 | 1.12 (0.59-2.11) | 0.73             | 0.16                 |                      |
| 189                     | S        | 0.133    | 0.135 | 0.98 (0.52-1.86) | 0.96             |                      |                      |
| 233                     | R        | 0.178    | 0.249 | 0.65 (0.37-1.14) | 0.13             | 0.025                |                      |
| 233                     | T        | 0.822    | 0.737 | 1.65 (0.94-2.90) | 0.079            |                      |                      |
| 235                     | F        | 0.978    | 0.973 | 1.21 (0.28-5.23) | 0.80             | 0.092                |                      |
| 235                     | R        | 0.022    | 0.013 | 1.75 (0.19-8.20) | 0.35             | *                    |                      |
| 236                     | L        | 0.978    | 0.973 | 1.21 (0.28-5.23) | 0.80             | 0.19                 |                      |
| 236                     | deletion | 0.022    | 0.017 | 1.28 (0.14-5.63) | 0.67             | *                    |                      |
| 237                     | S        | 0.978    | 0.973 | 1.21 (0.28-5.23) | 0.80             | 0.19                 |                      |
| 237                     | deletion | 0.022    | 0.017 | 1.28 (0.14-5.63) | 0.67             | *                    |                      |
| <b>HLA-DQβ1</b>         |          |          |       |                  |                  |                      |                      |
| <b>(164 amino acid)</b> | -32      | M        | 0.967 | 0.910            | 2.86 (0.88-9.25) | 0.079                | 0.032                |
|                         | -32      | deletion | 0.033 | 0.084            | 0.38 (0.07-1.19) | 0.10                 | *                    |
|                         | -31      | S        | 0.967 | 0.910            | 2.86 (0.88-9.25) | 0.079                | 0.032                |
|                         | -31      | deletion | 0.033 | 0.084            | 0.38 (0.07-1.19) | 0.10                 | *                    |
|                         | -30      | W        | 0.967 | 0.910            | 2.86 (0.88-9.25) | 0.079                | 0.032                |
|                         | -30      | deletion | 0.033 | 0.084            | 0.38 (0.07-1.19) | 0.10                 | *                    |
|                         | -29      | K        | 0.967 | 0.910            | 2.86 (0.88-9.25) | 0.079                | 0.032                |
|                         | -29      | deletion | 0.033 | 0.084            | 0.38 (0.07-1.19) | 0.10                 | *                    |
|                         | -28      | K        | 0.967 | 0.910            | 2.86 (0.88-9.25) | 0.079                | 0.032                |
|                         | -28      | deletion | 0.033 | 0.084            | 0.38 (0.07-1.19) | 0.10                 | *                    |
|                         | -27      | A        | 0.833 | 0.775            | 1.45 (0.81-2.58) | 0.21                 | 0.098                |
|                         | -27      | S        | 0.133 | 0.135            | 0.98 (0.52-1.86) | 0.96                 |                      |
|                         | -27      | deletion | 0.033 | 0.084            | 0.38 (0.07-1.19) | 0.10                 | *                    |
|                         | -26      | L        | 0.967 | 0.910            | 2.86 (0.88-9.25) | 0.079                | 0.032                |
|                         | -26      | deletion | 0.033 | 0.084            | 0.38 (0.07-1.19) | 0.10                 | *                    |
|                         | -25      | R        | 0.967 | 0.910            | 2.86 (0.88-9.25) | 0.079                | 0.032                |
|                         | -25      | deletion | 0.033 | 0.084            | 0.38 (0.07-1.19) | 0.10                 | *                    |
|                         | -24      | I        | 0.967 | 0.910            | 2.86 (0.88-9.25) | 0.079                | 0.032                |
|                         | -24      | deletion | 0.033 | 0.084            | 0.38 (0.07-1.19) | 0.10                 | *                    |
|                         | -23      | P        | 0.967 | 0.910            | 2.86 (0.88-9.25) | 0.079                | 0.032                |
|                         | -23      | deletion | 0.033 | 0.084            | 0.38 (0.07-1.19) | 0.10                 | *                    |
|                         | -22      | G        | 0.967 | 0.910            | 2.86 (0.88-9.25) | 0.079                | 0.032                |
|                         | -22      | deletion | 0.033 | 0.084            | 0.38 (0.07-1.19) | 0.10                 | *                    |
|                         | -21      | D        | 0.356 | 0.210            | 2.08 (1.31-3.30) | 0.0019               | 0.0025               |
|                         | -21      | G        | 0.611 | 0.701            | 0.67 (0.43-1.05) | 0.082                |                      |
|                         | -21      | deletion | 0.033 | 0.084            | 0.38 (0.07-1.19) | 0.10                 | *                    |
|                         | -20      | L        | 0.967 | 0.910            | 2.86 (0.88-9.25) | 0.079                | 0.032                |
|                         | -20      | deletion | 0.033 | 0.084            | 0.38 (0.07-1.19) | 0.10                 | *                    |
|                         | -19      | R        | 0.967 | 0.910            | 2.86 (0.88-9.25) | 0.079                | 0.032                |
|                         | -19      | deletion | 0.033 | 0.084            | 0.38 (0.07-1.19) | 0.10                 | *                    |
|                         | -18      | A        | 0.156 | 0.305            | 0.42 (0.23-0.75) | 0.0038               | 2.2×10 <sup>-4</sup> |
|                         | -18      | V        | 0.811 | 0.605            | 2.80 (1.63-4.84) | 2.1×10 <sup>-4</sup> |                      |
|                         | -18      | deletion | 0.033 | 0.084            | 0.38 (0.07-1.19) | 0.10                 | *                    |
|                         | -17      | A        | 0.844 | 0.711            | 2.21 (1.22-3.98) | 0.0084               | 0.011                |
|                         | -17      | P        | 0.122 | 0.199            | 0.56 (0.29-1.07) | 0.081                |                      |
|                         | -17      | deletion | 0.033 | 0.084            | 0.38 (0.07-1.19) | 0.10                 | *                    |
|                         | -16      | T        | 0.967 | 0.910            | 2.86 (0.88-9.25) | 0.079                | 0.032                |
|                         | -16      | deletion | 0.033 | 0.084            | 0.38 (0.07-1.19) | 0.10                 | *                    |
|                         | -15      | V        | 0.967 | 0.910            | 2.86 (0.88-9.25) | 0.079                | 0.032                |
|                         | -15      | deletion | 0.033 | 0.084            | 0.38 (0.07-1.19) | 0.10                 | *                    |
|                         | -14      | T        | 0.967 | 0.910            | 2.86 (0.88-9.25) | 0.079                | 0.032                |
|                         | -14      | deletion | 0.033 | 0.084            | 0.38 (0.07-1.19) | 0.10                 | *                    |
|                         | -13      | L        | 0.967 | 0.910            | 2.86 (0.88-9.25) | 0.079                | 0.032                |
|                         | -13      | deletion | 0.033 | 0.084            | 0.38 (0.07-1.19) | 0.10                 | *                    |
|                         | -12      | M        | 0.967 | 0.910            | 2.86 (0.88-9.25) | 0.079                | 0.032                |



|     |          |       |       |                  |                      |   |                      |
|-----|----------|-------|-------|------------------|----------------------|---|----------------------|
| -12 | deletion | 0.033 | 0.084 | 0.38 (0.12-1.22) | 0.10                 | * |                      |
| -11 | L        | 0.967 | 0.910 | 2.86 (0.88-9.25) | 0.079                |   | 0.032                |
| -11 | deletion | 0.033 | 0.084 | 0.38 (0.07-1.19) | 0.10                 | * |                      |
| -10 | A        | 0.967 | 0.908 | 2.94 (0.91-9.51) | 0.072                |   | 0.025                |
| -10 | deletion | 0.033 | 0.084 | 0.38 (0.07-1.19) | 0.10                 | * |                      |
| -9  | I        | 0.133 | 0.135 | 0.98 (0.52-1.86) | 0.96                 |   | 0.098                |
| -9  | M        | 0.833 | 0.775 | 1.45 (0.81-2.58) | 0.21                 |   |                      |
| -9  | deletion | 0.033 | 0.084 | 0.38 (0.07-1.19) | 0.10                 | * |                      |
| -8  | L        | 0.967 | 0.910 | 2.86 (0.88-9.25) | 0.079                |   | 0.032                |
| -8  | deletion | 0.033 | 0.084 | 0.38 (0.07-1.19) | 0.10                 | * |                      |
| -7  | S        | 0.967 | 0.910 | 2.86 (0.88-9.25) | 0.079                |   | 0.032                |
| -7  | deletion | 0.033 | 0.084 | 0.38 (0.07-1.19) | 0.10                 | * |                      |
| -6  | S        | 0.356 | 0.210 | 2.08 (1.31-3.30) | 0.0019               |   | 0.0025               |
| -6  | T        | 0.611 | 0.701 | 0.67 (0.43-1.05) | 0.082                |   |                      |
| -6  | deletion | 0.033 | 0.084 | 0.38 (0.07-1.19) | 0.10                 | * |                      |
| -5  | L        | 0.222 | 0.075 | 3.54 (2.03-6.20) | 8.9×10 <sup>-6</sup> |   | 1.7×10 <sup>-4</sup> |
| -5  | P        | 0.611 | 0.701 | 0.67 (0.43-1.05) | 0.082                |   |                      |
| -5  | S        | 0.133 | 0.135 | 0.98 (0.52-1.86) | 0.96                 |   |                      |
| -5  | deletion | 0.033 | 0.084 | 0.38 (0.07-1.19) | 0.10                 | * |                      |
| -4  | L        | 0.356 | 0.210 | 2.08 (1.31-3.30) | 0.0019               |   | 0.0025               |
| -4  | V        | 0.611 | 0.701 | 0.67 (0.43-1.05) | 0.082                |   |                      |
| -4  | deletion | 0.033 | 0.084 | 0.38 (0.07-1.19) | 0.10                 | * |                      |
| -3  | A        | 0.967 | 0.910 | 2.86 (0.88-9.25) | 0.079                |   | 0.032                |
| -3  | deletion | 0.033 | 0.084 | 0.38 (0.07-1.19) | 0.10                 | * |                      |
| -2  | E        | 0.967 | 0.910 | 2.86 (0.88-9.25) | 0.079                |   | 0.032                |
| -2  | deletion | 0.033 | 0.084 | 0.38 (0.07-1.19) | 0.10                 | * |                      |
| -1  | G        | 0.967 | 0.910 | 2.86 (0.88-9.25) | 0.079                |   | 0.032                |
| -1  | deletion | 0.033 | 0.084 | 0.38 (0.07-1.19) | 0.10                 | * |                      |
| 3   | P        | 0.122 | 0.199 | 0.56 (0.29-1.07) | 0.081                |   | 0.033                |
| 3   | S        | 0.878 | 0.795 | 1.85 (0.97-3.56) | 0.064                |   |                      |
| 9   | F        | 0.489 | 0.216 | 3.48 (2.23-5.43) | 3.7×10 <sup>-8</sup> |   | 3.6×10 <sup>-7</sup> |
| 9   | L        | 0.122 | 0.199 | 0.56 (0.29-1.07) | 0.081                |   |                      |
| 9   | Y        | 0.389 | 0.579 | 0.46 (0.30-0.72) | 6.8×10 <sup>-4</sup> |   |                      |
| 13  | A        | 0.156 | 0.311 | 0.41 (0.23-0.73) | 0.0028               |   | 6.0×10 <sup>-4</sup> |
| 13  | G        | 0.844 | 0.683 | 2.52 (1.40-4.54) | 0.0021               |   |                      |
| 14  | L        | 0.133 | 0.135 | 0.98 (0.52-1.86) | 0.96                 |   | 0.32                 |
| 14  | M        | 0.867 | 0.859 | 1.07 (0.56-2.02) | 0.84                 |   |                      |
| 23  | L        | 0.222 | 0.100 | 2.56 (1.49-4.42) | 7.0×10 <sup>-4</sup> |   | 9.3×10 <sup>-4</sup> |
| 23  | R        | 0.778 | 0.894 | 0.42 (0.24-0.71) | 0.0015               |   |                      |
| 26  | G        | 0.422 | 0.283 | 1.85 (1.19-2.88) | 0.0066               |   | 0.0010               |
| 26  | L        | 0.422 | 0.400 | 1.10 (0.71-1.70) | 0.68                 |   |                      |
| 26  | Y        | 0.156 | 0.311 | 0.41 (0.23-0.73) | 0.0028               |   |                      |
| 30  | H        | 0.167 | 0.215 | 0.73 (0.41-1.31) | 0.29                 |   | 0.10                 |
| 30  | Y        | 0.833 | 0.777 | 1.43 (0.80-2.55) | 0.22                 |   |                      |
| 37  | D        | 0.122 | 0.199 | 0.56 (0.29-1.07) | 0.081                |   | 0.026                |
| 37  | Y        | 0.878 | 0.793 | 1.88 (0.98-3.61) | 0.058                |   |                      |
| 38  | A        | 0.744 | 0.657 | 1.52 (0.93-2.49) | 0.098                |   | 0.056                |
| 38  | V        | 0.256 | 0.337 | 0.68 (0.41-1.11) | 0.12                 |   |                      |
| 45  | E        | 0.033 | 0.112 | 0.27 (0.05-0.85) | 0.017                | * | 0.0046               |
| 45  | G        | 0.967 | 0.882 | 3.87 (1.20-12.5) | 0.023                |   |                      |
| 53  | L        | 0.489 | 0.509 | 0.92 (0.60-1.42) | 0.71                 |   | 0.28                 |
| 53  | Q        | 0.511 | 0.485 | 1.11 (0.72-1.72) | 0.64                 |   |                      |
| 55  | P        | 0.200 | 0.359 | 0.45 (0.26-0.76) | 0.0031               |   | 6.5×10 <sup>-4</sup> |
| 55  | R        | 0.800 | 0.633 | 2.32 (1.36-3.96) | 0.0020               |   |                      |
| 56  | L        | 0.289 | 0.148 | 2.34 (1.43-3.83) | 7.4×10 <sup>-4</sup> |   | 8.3×10 <sup>-4</sup> |
| 56  | P        | 0.711 | 0.846 | 0.45 (0.27-0.73) | 0.0014               |   |                      |
| 57  | A        | 0.078 | 0.108 | 0.69 (0.31-1.55) | 0.37                 |   | 0.38                 |
| 57  | D        | 0.789 | 0.716 | 1.48 (0.88-2.52) | 0.14                 |   |                      |
| 57  | S        | 0.022 | 0.028 | 0.79 (0.09-3.27) | 1.0                  | * |                      |
| 57  | V        | 0.111 | 0.142 | 0.75 (0.38-1.50) | 0.42                 |   |                      |
| 66  | D        | 0.411 | 0.350 | 1.30 (0.83-2.02) | 0.25                 |   | 0.14                 |
| 66  | E        | 0.589 | 0.645 | 0.79 (0.51-1.23) | 0.30                 |   |                      |
| 67  | I        | 0.411 | 0.350 | 1.30 (0.83-2.02) | 0.25                 |   | 0.14                 |
| 67  | V        | 0.589 | 0.645 | 0.79 (0.51-1.23) | 0.30                 |   |                      |
| 70  | E        | 0.289 | 0.148 | 2.34 (1.43-3.83) | 7.4×10 <sup>-4</sup> |   | 3.8×10 <sup>-6</sup> |
| 70  | G        | 0.333 | 0.206 | 1.92 (1.20-3.07) | 0.0062               |   |                      |
| 70  | R        | 0.378 | 0.640 | 0.34 (0.22-0.54) | 2.7×10 <sup>-6</sup> |   |                      |
| 71  | A        | 0.133 | 0.135 | 0.98 (0.52-1.86) | 0.96                 |   | 0.0027               |
| 71  | D        | 0.289 | 0.148 | 2.34 (1.43-3.83) | 7.4×10 <sup>-4</sup> |   |                      |
| 71  | T        | 0.578 | 0.709 | 0.56 (0.36-0.88) | 0.011                |   |                      |
| 74  | E        | 0.578 | 0.709 | 0.56 (0.36-0.88) | 0.011                |   | 0.0040               |
| 74  | S        | 0.422 | 0.283 | 1.85 (1.19-2.88) | 0.0066               |   |                      |
| 75  | L        | 0.578 | 0.709 | 0.56 (0.36-0.88) | 0.011                |   | 0.0056               |
| 75  | V        | 0.422 | 0.286 | 1.83 (1.17-2.85) | 0.0077               |   |                      |
| 77  | R        | 0.133 | 0.138 | 0.96 (0.51-1.83) | 0.91                 |   | 0.31                 |
| 77  | T        | 0.867 | 0.857 | 1.09 (0.58-2.06) | 0.80                 |   |                      |
| 84  | E        | 0.511 | 0.485 | 1.11 (0.72-1.72) | 0.64                 |   | 0.28                 |
| 84  | Q        | 0.489 | 0.509 | 0.92 (0.60-1.42) | 0.71                 |   |                      |
| 85  | L        | 0.489 | 0.509 | 0.92 (0.60-1.42) | 0.71                 |   | 0.28                 |
| 85  | V        | 0.511 | 0.485 | 1.11 (0.72-1.72) | 0.64                 |   |                      |
| 86  | A        | 0.456 | 0.406 | 1.23 (0.79-1.90) | 0.36                 |   | 0.33                 |
| 86  | E        | 0.489 | 0.509 | 0.92 (0.60-1.42) | 0.71                 |   |                      |
| 86  | G        | 0.056 | 0.079 | 0.68 (0.21-1.74) | 0.54                 | * |                      |
| 87  | F        | 0.322 | 0.270 | 1.28 (0.80-2.05) | 0.30                 |   | 0.35                 |
| 87  | L        | 0.489 | 0.509 | 0.92 (0.60-1.42) | 0.71                 |   |                      |
| 87  | Y        | 0.189 | 0.215 | 0.85 (0.49-1.48) | 0.57                 |   |                      |
| 89  | G        | 0.511 | 0.485 | 1.11 (0.72-1.72) | 0.64                 |   | 0.28                 |
| 89  | T        | 0.489 | 0.509 | 0.92 (0.60-1.42) | 0.71                 |   |                      |
| 90  | I        | 0.511 | 0.485 | 1.11 (0.72-1.72) | 0.64                 |   | 0.28                 |
| 90  | T        | 0.489 | 0.509 | 0.92 (0.60-1.42) | 0.71                 |   |                      |
| 116 | I        | 0.133 | 0.135 | 0.98 (0.52-1.86) | 0.96                 |   | 0.32                 |
| 116 | V        | 0.867 | 0.859 | 1.07 (0.56-2.02) | 0.84                 |   |                      |
| 125 | A        | 0.489 | 0.509 | 0.92 (0.60-1.42) | 0.71                 |   | 0.54                 |
| 125 | G        | 0.378 | 0.350 | 1.13 (0.72-1.77) | 0.60                 |   |                      |
| 125 | S        | 0.133 | 0.135 | 0.98 (0.52-1.86) | 0.96                 |   |                      |
| 126 | H        | 0.022 | 0.028 | 0.79 (0.09-3.27) | 1.0                  | * | 0.29                 |
| 126 | Q        | 0.978 | 0.966 | 1.54 (0.36-6.56) | 0.56                 |   |                      |

|     |   |       |       |                  |        |   |                      |
|-----|---|-------|-------|------------------|--------|---|----------------------|
| 130 | Q | 0.056 | 0.079 | 0.68 (0.21-1.74) | 0.54   | * | 0.19                 |
| 130 | R | 0.944 | 0.915 | 1.58 (0.62-4.02) | 0.34   |   |                      |
| 140 | A | 0.511 | 0.487 | 1.10 (0.71-1.70) | 0.67   |   | 0.28                 |
| 140 | T | 0.489 | 0.507 | 0.93 (0.60-1.44) | 0.74   |   |                      |
| 167 | H | 0.156 | 0.311 | 0.41 (0.23-0.73) | 0.0028 |   | 6.0×10 <sup>-4</sup> |
| 167 | R | 0.844 | 0.683 | 2.52 (1.40-4.54) | 0.0021 |   |                      |
| 182 | N | 0.489 | 0.507 | 0.93 (0.60-1.44) | 0.74   |   | 0.28                 |
| 182 | S | 0.511 | 0.487 | 1.10 (0.71-1.70) | 0.67   |   |                      |
| 185 | I | 0.456 | 0.395 | 1.28 (0.83-1.98) | 0.27   |   | 0.14                 |
| 185 | T | 0.544 | 0.599 | 0.80 (0.52-1.24) | 0.32   |   |                      |
| 197 | N | 0.122 | 0.199 | 0.56 (0.29-1.07) | 0.081  |   | 0.033                |
| 197 | S | 0.878 | 0.795 | 1.85 (0.97-3.56) | 0.064  |   |                      |
| 203 | I | 0.611 | 0.701 | 0.67 (0.43-1.05) | 0.082  |   | 0.014                |
| 203 | V | 0.389 | 0.286 | 1.59 (1.02-2.49) | 0.042  |   |                      |
| 220 | H | 0.489 | 0.501 | 0.95 (0.62-1.47) | 0.82   |   | 0.11                 |
| 220 | R | 0.511 | 0.485 | 1.11 (0.72-1.72) | 0.64   |   |                      |
| 221 | H | 0.489 | 0.501 | 0.95 (0.62-1.47) | 0.82   |   | 0.11                 |
| 221 | Q | 0.511 | 0.485 | 1.11 (0.72-1.72) | 0.64   |   |                      |
| 224 | Q | 0.867 | 0.851 | 1.14 (0.60-2.15) | 0.69   |   | 0.12                 |
| 224 | R | 0.133 | 0.135 | 0.98 (0.52-1.86) | 0.96   |   |                      |
| 230 | A | 0.822 | 0.751 | 1.54 (0.88-2.70) | 0.13   |   | 0.076                |
| 230 | P | 0.178 | 0.244 | 0.67 (0.38-1.18) | 0.17   |   |                      |

\* Fisher's exact test was used for association analysis, otherwise logistic regression was used.





Table S4. Results of the HLA amino acid association analysis (neuromyelitis optica spectrum disorder)

| Variant                              | Frequency |            |            |                  | OR(95%CI)        | P     | Fisher |
|--------------------------------------|-----------|------------|------------|------------------|------------------|-------|--------|
|                                      | Position  | amino acid | NMO (n=31) | Control (n=429)  |                  |       |        |
| HLA-DQ $\alpha$ 1<br>(90 amino acid) | -16       | L          | 0.516      | 0.540            | 0.91 (0.54-1.52) | 0.72  |        |
|                                      | -16       | M          | 0.484      | 0.460            | 1.10 (0.66-1.84) | 0.72  |        |
|                                      | -13       | A          | 0.903      | 0.948            | 0.52 (0.21-1.26) | 0.15  |        |
|                                      | -13       | T          | 0.097      | 0.052            | 1.94 (0.79-4.73) | 0.15  |        |
|                                      | -7        | M          | 0.032      | 0.066            | 0.47 (0.05-1.85) | 0.42  | *      |
|                                      | -7        | V          | 0.968      | 0.934            | 2.13 (0.51-8.96) | 0.30  |        |
|                                      | -6        | M          | 0.952      | 0.853            | 3.39 (1.05-11.0) | 0.042 |        |
|                                      | -6        | T          | 0.048      | 0.147            | 0.30 (0.06-0.93) | 0.035 | *      |
|                                      | 2         | D          | 0.968      | 0.934            | 2.13 (0.51-8.96) | 0.30  |        |
|                                      | 2         | G          | 0.032      | 0.066            | 0.47 (0.05-1.85) | 0.42  | *      |
|                                      | 11        | C          | 0.484      | 0.485            | 1.00 (0.59-1.67) | 0.99  |        |
|                                      | 11        | Y          | 0.516      | 0.515            | 1.00 (0.60-1.68) | 0.99  |        |
|                                      | 18        | F          | 0.484      | 0.485            | 1.00 (0.59-1.67) | 0.99  |        |
|                                      | 18        | S          | 0.516      | 0.515            | 1.00 (0.60-1.68) | 0.99  |        |
|                                      | 25        | F          | 0.177      | 0.226            | 0.74 (0.38-1.44) | 0.38  |        |
|                                      | 25        | Y          | 0.823      | 0.774            | 1.35 (0.69-2.65) | 0.38  |        |
|                                      | 26        | S          | 0.290      | 0.377            | 0.68 (0.38-1.19) | 0.18  |        |
|                                      | 26        | T          | 0.710      | 0.624            | 1.48 (0.84-2.60) | 0.18  |        |
|                                      | 34        | E          | 0.452      | 0.502            | 0.82 (0.49-1.37) | 0.44  |        |
|                                      | 34        | Q          | 0.548      | 0.498            | 1.23 (0.73-2.06) | 0.44  |        |
|                                      | 40        | E          | 0.774      | 0.863            | 0.55 (0.29-1.02) | 0.059 |        |
|                                      | 40        | G          | 0.226      | 0.138            | 1.83 (0.98-3.42) | 0.059 |        |
|                                      | 41        | K          | 0.177      | 0.204            | 0.84 (0.43-1.65) | 0.62  |        |
|                                      | 41        | R          | 0.823      | 0.796            | 1.19 (0.61-2.33) | 0.62  |        |
|                                      | 45        | A          | 0.484      | 0.485            | 1.00 (0.59-1.67) | 0.99  |        |
|                                      | 45        | V          | 0.516      | 0.515            | 1.00 (0.60-1.68) | 0.99  |        |
|                                      | 47        | C          | 0.226      | 0.138            | 1.83 (0.98-3.42) | 0.059 |        |
|                                      | 47        | Q          | 0.290      | 0.377            | 0.68 (0.38-1.19) | 0.18  |        |
|                                      | 47        | R          | 0.484      | 0.485            | 1.00 (0.59-1.67) | 0.99  |        |
|                                      | 48        | L          | 0.516      | 0.515            | 1.00 (0.60-1.68) | 0.99  |        |
|                                      | 48        | W          | 0.484      | 0.485            | 1.00 (0.59-1.67) | 0.99  |        |
|                                      | 50        | E          | 0.484      | 0.485            | 1.00 (0.59-1.67) | 0.99  |        |
|                                      | 50        | L          | 0.290      | 0.378            | 0.67 (0.38-1.19) | 0.17  |        |
|                                      | 50        | V          | 0.226      | 0.138            | 1.83 (0.98-3.42) | 0.059 |        |
|                                      | 51        | F          | 0.774      | 0.863            | 0.55 (0.29-1.02) | 0.059 |        |
|                                      | 51        | L          | 0.226      | 0.138            | 1.83 (0.98-3.42) | 0.059 |        |
|                                      | 52        | R          | 0.516      | 0.514            | 1.01 (0.60-1.69) | 0.97  |        |
|                                      | 52        | S          | 0.484      | 0.485            | 1.00 (0.59-1.67) | 0.99  |        |
|                                      | 53        | K          | 0.484      | 0.485            | 1.00 (0.59-1.67) | 0.99  |        |
|                                      | 53        | Q          | 0.226      | 0.138            | 1.83 (0.98-3.42) | 0.059 |        |
|                                      | 53        | R          | 0.290      | 0.378            | 0.67 (0.38-1.19) | 0.17  |        |
|                                      | 55        | G          | 0.484      | 0.485            | 1.00 (0.59-1.67) | 0.99  |        |
|                                      | 55        | R          | 0.516      | 0.515            | 1.00 (0.60-1.68) | 0.99  |        |
|                                      | 56        | G          | 0.484      | 0.485            | 1.81 (0.97-3.39) | 0.063 |        |
|                                      | 56        | O          | 0.226      | 0.139            | 1.00 (0.59-1.67) | 0.99  |        |
|                                      | 56        | R          | 0.290      | 0.377            | 0.68 (0.38-1.19) | 0.18  |        |
|                                      | 61        | F          | 0.516      | 0.515            | 1.00 (0.60-1.68) | 0.99  |        |
| 61                                   | G         | 0.484      | 0.485      | 1.00 (0.59-1.67) | 0.99             |       |        |
| 64                                   | R         | 0.484      | 0.485      | 1.00 (0.59-1.67) | 0.99             |       |        |
| 64                                   | T         | 0.516      | 0.515      | 1.00 (0.60-1.68) | 0.99             |       |        |
| 66                                   | I         | 0.516      | 0.515      | 1.00 (0.60-1.68) | 0.99             |       |        |
| 66                                   | M         | 0.484      | 0.485      | 1.00 (0.59-1.67) | 0.99             |       |        |
| 69                                   | A         | 0.484      | 0.485      | 1.00 (0.59-1.67) | 0.99             |       |        |
| 69                                   | L         | 0.484      | 0.460      | 1.10 (0.66-1.84) | 0.72             |       |        |
| 69                                   | T         | 0.032      | 0.055      | 0.58 (0.07-2.29) | 0.77             | *     |        |
| 75                                   | I         | 0.807      | 0.917      | 0.38 (0.19-0.74) | 0.0045           |       |        |
| 75                                   | S         | 0.194      | 0.083      | 2.66 (1.35-5.23) | 0.0045           |       |        |
| 76                                   | L         | 0.226      | 0.139      | 1.81 (0.97-3.39) | 0.063            |       |        |
| 76                                   | M         | 0.484      | 0.485      | 1.00 (0.59-1.67) | 0.99             |       |        |
| 76                                   | V         | 0.290      | 0.377      | 0.68 (0.38-1.19) | 0.18             |       |        |
| 80                                   | S         | 0.516      | 0.515      | 1.00 (0.60-1.68) | 0.99             |       |        |
| 80                                   | Y         | 0.484      | 0.485      | 1.00 (0.59-1.67) | 0.99             |       |        |
| 107                                  | I         | 0.194      | 0.083      | 2.66 (1.35-5.23) | 0.0045           |       |        |
| 107                                  | T         | 0.807      | 0.917      | 0.38 (0.19-0.74) | 0.0045           |       |        |
| 129                                  | H         | 0.694      | 0.719      | 0.88 (0.50-1.55) | 0.67             |       |        |
| 129                                  | Q         | 0.307      | 0.281      | 1.13 (0.65-1.98) | 0.67             |       |        |
| 130                                  | A         | 0.177      | 0.204      | 0.84 (0.43-1.65) | 0.62             |       |        |
| 130                                  | S         | 0.823      | 0.796      | 1.19 (0.61-2.33) | 0.62             |       |        |
| 156                                  | F         | 0.807      | 0.917      | 0.38 (0.19-0.74) | 0.0045           |       |        |
| 156                                  | L         | 0.194      | 0.083      | 2.66 (1.35-5.23) | 0.0045           |       |        |
| 160                                  | A         | 0.677      | 0.683      | 0.97 (0.56-1.69) | 0.93             |       |        |
| 160                                  | D         | 0.226      | 0.288      | 0.72 (0.39-1.33) | 0.30             |       |        |
| 160                                  | S         | 0.097      | 0.029      | 3.57 (1.41-9.06) | 0.0074           |       |        |
| 161                                  | D         | 0.807      | 0.917      | 0.38 (0.19-0.74) | 0.0045           |       |        |
| 161                                  | E         | 0.194      | 0.083      | 2.66 (1.35-5.23) | 0.0045           |       |        |
| 163                                  | I         | 0.807      | 0.917      | 0.38 (0.19-0.74) | 0.0045           |       |        |
| 163                                  | S         | 0.194      | 0.083      | 2.66 (1.35-5.23) | 0.0045           |       |        |
| 175                                  | E         | 0.323      | 0.432      | 0.63 (0.36-1.08) | 0.094            |       |        |
| 175                                  | K         | 0.194      | 0.083      | 2.66 (1.35-5.23) | 0.0045           |       |        |
| 175                                  | Q         | 0.484      | 0.485      | 1.00 (0.59-1.67) | 0.99             |       |        |
| 187                                  | A         | 0.710      | 0.624      | 1.48 (0.84-2.60) | 0.18             |       |        |
| 187                                  | T         | 0.290      | 0.377      | 0.68 (0.38-1.19) | 0.18             |       |        |
| 199                                  | A         | 0.968      | 0.937      | 2.01 (0.48-8.46) | 0.34             |       |        |
| 199                                  | T         | 0.032      | 0.063      | 0.50 (0.06-1.97) | 0.58             | *     |        |
| 207                                  | M         | 0.145      | 0.156      | 0.92 (0.44-1.90) | 0.82             |       |        |
| 207                                  | V         | 0.855      | 0.844      | 1.09 (0.53-2.26) | 0.82             |       |        |
| 215                                  | F         | 0.710      | 0.622      | 1.48 (0.84-2.61) | 0.17             |       |        |
| 215                                  | L         | 0.290      | 0.378      | 0.67 (0.38-1.19) | 0.17             |       |        |
| 218                                  | Q         | 0.484      | 0.485      | 1.00 (0.59-1.67) | 0.99             |       |        |
| 218                                  | R         | 0.516      | 0.515      | 1.00 (0.60-1.68) | 0.99             |       |        |

\* Fisher's exact test was used for association analysis, otherwise logistic regression was used.
